# Supplementary material
Source: Springer Nature journal article supplement (https://www.springermedizin.de/resource/supplementary/12885_2010_2426_MOESM4_ESM.pdf/9461264)

**B5 replicate1**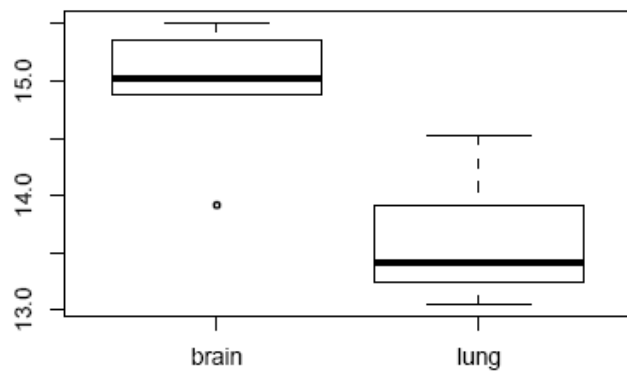**B5 replicate2**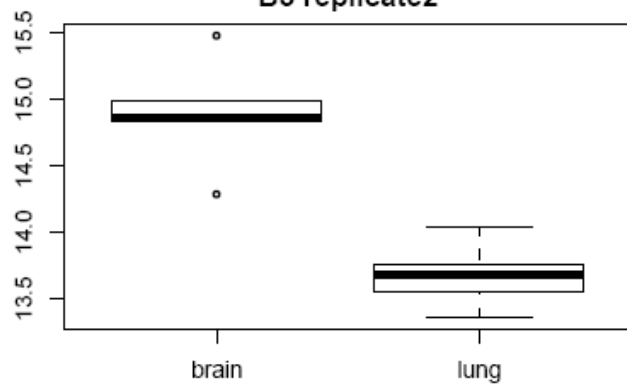**E7 replicate1**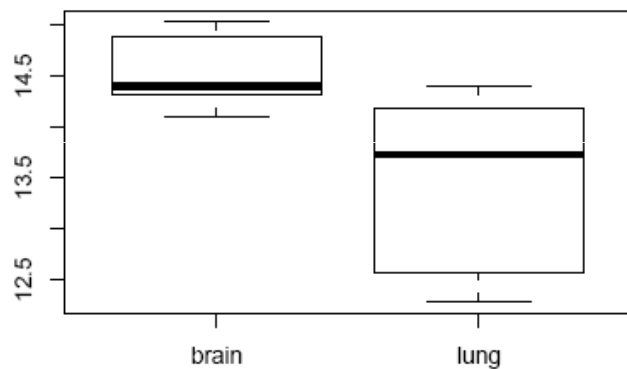**E7 replicate2**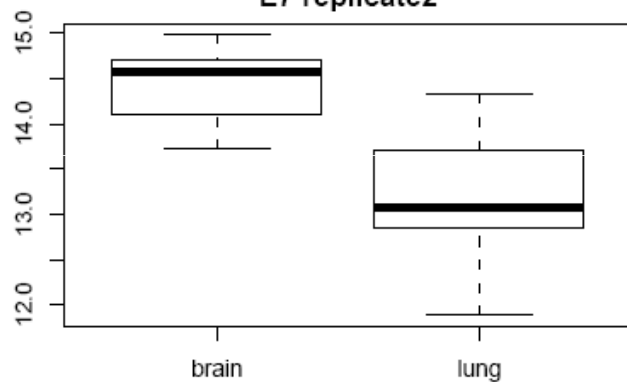**D11 replicate1**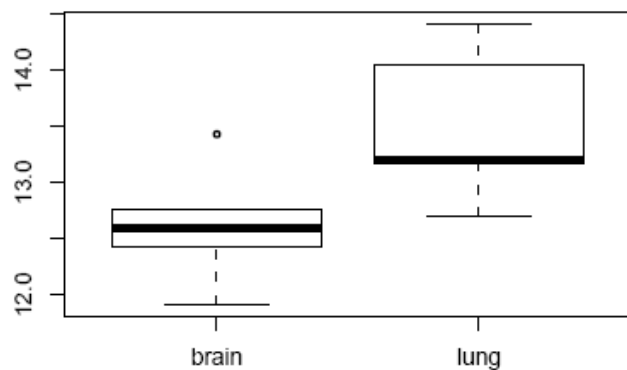**D11 replicate2**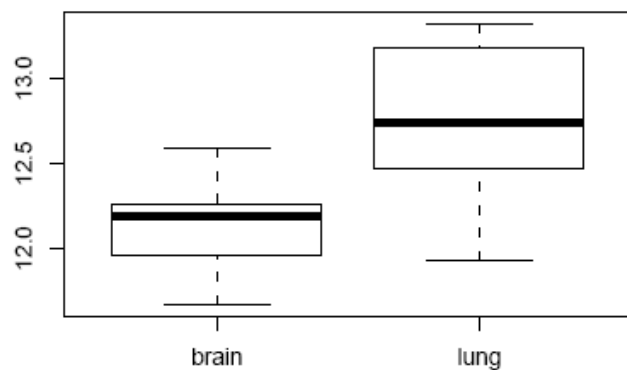 $\log_2(\text{Signal})$

Supplement: MOESM4 [file 9461264]
